# Supplementary material for: Cisplatin Resistance in Testicular Germ Cell Tumors: Current Challenges from Various Perspectives
Source: PubMed Central journal article supplement (PMC7352163; doi:10.3390/cancers12061601), 2020-06-17
Supplement: cancers-12-01601-s001.pdf [file cancers-12-01601-s001.pdf]

Review

# Cisplatin Resistance in Testicular Germ Cell Tumors: Current Challenges from Various Perspectives

João Lobo, Carmen Jerónimo and Rui Henrique

**Table S1.** Summary of some recent studies exploring cisplatin resistance in tumor models other than testicular germ cell tumors.

| Tumor Model                              | Main Mechanism                                                                            | Main Findings                                                                                                                                                                                           | Reference            |
|------------------------------------------|-------------------------------------------------------------------------------------------|---------------------------------------------------------------------------------------------------------------------------------------------------------------------------------------------------------|----------------------|
| Bladder Cancer                           | Uptake/Efflux/Detoxification, DNA repair, apoptosis, epigenetics, growth factors          | Details the impact of extrinsic and intrinsic apoptosis pathways. Details epigenetic regulation of these pathways.                                                                                      | Broad review in [1]  |
| Epithelial (i.e. non-GCT) Ovarian Cancer | DNA repair                                                                                | Alterations of HR, NER, BER and MMR contribute to cisplatin sensitivity/resistance. Mutations in HR genes as biomarkers of response to PARPis                                                           | Broad review in [2]  |
|                                          | TLS                                                                                       | Overexpression of DNA polymerase eta contributes to cisplatin resistance                                                                                                                                | [3]                  |
| Lung cancer (SCLC)                       | Apoptosis                                                                                 | Sensitivity to cisplatin correlates with Bcl-2/Bim ratio. The BH3-mimetic ABT-263 sensitizes tumor cells to cisplatin and radiation                                                                     | [4]                  |
| Lung cancer (NSCLC)                      | Epigenetics                                                                               | Silencing the lncRNA UCA1 sensitizes tumor cells to cisplatin                                                                                                                                           | [5]                  |
|                                          | TLS                                                                                       | Overexpression of DNA polymerase eta predicts survival after treatment with cisplatin                                                                                                                   | [6]                  |
| Esophageal cancer                        | Epigenetics                                                                               | miR-338-5p promoted cisplatin sensitivity in tumor cells, by targeting <i>FERMT2</i>                                                                                                                    | [7]                  |
| Head and neck cancer                     | Autophagy and microenvironment                                                            | CAFs contribute to cisplatin resistance by activating autophagy                                                                                                                                         | [8]                  |
| Gastric cancer                           | EMT                                                                                       | The transcription factor eIF5A2 regulates cisplatin resistance by promoting EMT                                                                                                                         | [9]                  |
| Colorectal cancer                        | Apoptosis, inflammatory cytokines                                                         | The pro-inflammatory cytokine IL-17 promotes cisplatin resistance. Regulates apoptotic players Bax, Bcl-2                                                                                               | [10]                 |
| Breast cancer                            | p53 and inflammatory cytokines                                                            | The <i>TP63</i> isoform $\Delta$ NP63 $\alpha$ (which counteracts p53 by promoting pro-survival signals) is induced by IL-1 $\beta$ and downregulates <i>ATM</i> , contributing to cisplatin resistance | [11]                 |
| Cervical cancer                          | Efflux, DNA repair, apoptosis, epigenetics, EMT, activation of stress response chaperones | Multifactorial perspective. Includes overview of several agents (including natural compounds) that antagonize cisplatin resistance                                                                      | Broad review in [12] |

Abbreviations: BER – base excision repair; CAF – cancer-associated fibroblast; EMT – epithelial-to-mesenchymal transition; HR – homologous recombination; lncRNA – long non-coding RNA; MMR –

mismatch repair; NER – nucleotide excision repair; NSCLC – non-small cell lung cancer; SCLC – small cell lung cancer; TLS – translesion synthesis.

**Table S2.** Review of the literature regarding growing teratoma syndrome with testicular origin.

| Number of Patients | Age                    | Pre-CT Histology                    | Testicular Tumor laterality | Pre-CT Tumor size (cm)                                               | Staging               | Presentation                                                | TM Before CT | Topography and Size of GTS Masses        | Treatments Performed                                | Complications                                                                                                           | Patient Outcome / Follow-up (months)                                  | Relevant Details                       | Author (Ref.)                     |
|--------------------|------------------------|-------------------------------------|-----------------------------|----------------------------------------------------------------------|-----------------------|-------------------------------------------------------------|--------------|------------------------------------------|-----------------------------------------------------|-------------------------------------------------------------------------------------------------------------------------|-----------------------------------------------------------------------|----------------------------------------|-----------------------------------|
| 1                  | 20y                    | Metastases: imTE                    | Left                        | Testis: 10x7x8; Metastases: N/A ("entire abdomen and pelvis + neck") | N/A; IGCCCG good risk | Testicular mass + abdominal distension + leg swelling (DVT) | Elevated     | "Entire abdomen and pelvis" + neck (8cm) | 3BEP→Orchiectomy along with radical Resection + LND | Seroma (resolved)                                                                                                       | ANED (8)                                                              | Orchiectomy only after CT              | Nassiri, 2019 [13]                |
| 1                  | 19y                    | Testis: mixed                       | Left                        | N/A                                                                  | III (lung metastases) | Testicular mass + constitutional symptoms                   | N/A          | Lung + hilar, N/A                        | Orchiectomy→3BEP+3TIP→2 Resections                  | None                                                                                                                    | ANED (12)                                                             | -                                      | Tanaka, 2018 [14]                 |
| 22                 | Median 28y (IQR 22-34) | Testis: 16 Mixed, 2 EC, 2 YST, 2 TE | N/A                         | Testis: median 4.8 (IQR 1.9-9.4)                                     | 16 II, 5 III, 1 N/A   | N/A                                                         | Elevated     | Median 6 (IQR 4-12.2)                    | Orchiectomy→CT→RPLND                                | Adjunctive surgeries (n=4); rapid growth needing CT interruption (n=1); grade III/IV post-operative complications (n=4) | Disease relapse (n=2); DFD (n=1; 9 after RPLND); median 25 (IQR 8-47) | Only patients undergoing post-CT RPLND | Paffenholz and Pfister, 2018 [15] |

|   |                   |                              |       |                                                         |                               |                     |                                    |                                                 |                                        |                              |                                                       |                                            |                       |
|---|-------------------|------------------------------|-------|---------------------------------------------------------|-------------------------------|---------------------|------------------------------------|-------------------------------------------------|----------------------------------------|------------------------------|-------------------------------------------------------|--------------------------------------------|-----------------------|
| 1 | 36y               | Testis: TE with ST cells     | Left  | Testis: 2; paratracheal nodes: 1; lombo-aortic nodes: 2 | pT1                           | Testicular pain     | Elevated $\beta$ -HCG              | Abdominal, 4.5; Mediastinal: 2; Cervical: 5     | Orchiectomy→2BEP→RPLND→3 Resections    | Horner syndrome              | Disease relapse (GTS 3, 6, 8 after RPLND); ANED (48)  | -                                          | Priod, 2017 [16]      |
| 1 | PT:47y; GTS: 51y  | Testis: Mixed (YST, mTE, EC) | N/A   | Testis: 10                                              | I                             | Shortness of breath | Normal                             | Abdominal (19x18)+ Chest (14x12)+ Thigh (16x10) | Orchiectomy→BEP+VIP→RPLND+2 Resections | None                         | Disease relapse (GTS 48 after orchiectomy); ANED (24) | -                                          | Gange, 2016 [17]      |
| 2 | PT: 23y; GTS: 24y | Testis: Mixed (TE, CH, EC)   | Right | N/A                                                     | T2 (IIC); IGCCCG intermediate | N/A                 | N/A                                | Abdominal, 21                                   | Orchiectomy→4BEP→Resection             | None                         | Disease relapse (GTS 12 after orchiectomy); ANED (10) | -                                          | Scavuzzo, 2014 [18]   |
|   | 28y               | Testis: Mixed (TE, EC)       | Left  | III A                                                   |                               |                     | Elevated AFP, LDH and $\beta$ -HCG | Abdominal, 30                                   | Orchiectomy→3BEP→Resection             |                              | Disease relapse (GTS 6 after orchiectomy); ANED (8)   |                                            |                       |
| 1 | 27y               | N/A                          | Left  | N/A                                                     | N/A                           | N/A                 | N/A                                | Abdominal, cardiac (right ventricle)            | CT→Orchiectomy→2 Resections            | Mild tricuspid regurgitation | ANED (24)                                             | Orchiectomy only after CT; tricuspid valve | Roubelakis, 2014 [19] |

|    |                                 |                                                                   |     |     |             |     |     |                                                                            |                      |                                                                          |                         |                                                    |                      |
|----|---------------------------------|-------------------------------------------------------------------|-----|-----|-------------|-----|-----|----------------------------------------------------------------------------|----------------------|--------------------------------------------------------------------------|-------------------------|----------------------------------------------------|----------------------|
|    |                                 |                                                                   |     |     |             |     |     |                                                                            |                      |                                                                          |                         | repair<br>technique<br>after<br>tumor<br>excision  |                      |
| 15 | Median<br>23y<br>(range: 16-39) | Testis: NS<br>in 12, SE<br>in 2,<br>"hemorrhagic<br>mass" in<br>1 | N/A | N/A | 8 II, 7 III | N/A | N/A | Retroperitoneal,<br>median 7<br>(range 4-25); non-<br>retroperitoneal in 4 | Orchiectomy→CT→RPLND | 2 major<br>(Clavien<br>≥III); 5<br>additional<br>procedures<br>performed | ANED (8,<br>range 1-64) | mTE in<br>only 40%<br>patients<br>at<br>orchiotomy | Lee,<br>2014<br>[20] |

**Abbreviations:** AFP: alpha fetoprotein; ANED: alive with no evidence of disease; β-HCG: human chorionic gonadotropin subunit β; CH: choriocarcinoma; CT: chemotherapy; DFD: died from disease; DVT – deep venous thrombosis; EC: embryonal carcinoma; GTS – growing teratoma syndrome; IGCCCG: International Germ Cell Cancer Collaborative Group; imTE: immature teratoma; IQR: interquartile range; LDH: lactate dehydrogenase; LND: lymph-node dissection; mTE: mature teratoma; N/A – not available; NS – non-seminoma; PT: primary tumor; RPLND: retroperitoneal lymph-node dissection; SE – seminoma; TM: tumor markers; YST: yolk sac tumor

Table S3 – Review of the literature regarding growing teratoma syndrome with ovarian origin.

| Patient s (N) | Age                  | Histology (and Grade of NmTE) | Ovarian tumor laterality | Pre-CT Tumor Size (cm)                                                 | Staging  | Presentation                                | TM Before CT | Topography and Size of GTS Mass (cm)               | Treatments Performed                                                                 | Complications | Patient Outcome / Follow-up After Last Treatment (months) | Relevant Details                                                                                          | Author (Ref.)      |
|---------------|----------------------|-------------------------------|--------------------------|------------------------------------------------------------------------|----------|---------------------------------------------|--------------|----------------------------------------------------|--------------------------------------------------------------------------------------|---------------|-----------------------------------------------------------|-----------------------------------------------------------------------------------------------------------|--------------------|
| 2             | 21y                  | Ovary: Mixed                  | Left                     | 13x7                                                                   | N/A      | Abdominal distension                        | Elevated AFP | Adnexal, 35x20                                     | 3BEP→Resection                                                                       | None          | ANED (24)                                                 | -                                                                                                         | Saba, 2018 [21]    |
|               | 23y                  | Ovary: Mixed (imTE + YST)     | Right                    | N/A                                                                    |          | N/A                                         | N/A          | Adnexal, 7x4                                       | 3BEP→Resection                                                                       | None          | ANED (6)                                                  |                                                                                                           |                    |
| 1             | PT: 35y;<br>GTS: 57y | Ovary: imTE                   | N/A                      | N/A                                                                    | N/A      | Asymptomatic                                | Normal       | Pelvic + Hepatic (recurrence)                      | TH+BSO→5MTX/VP16→Resection                                                           | None          | GTS 264 after 1 <sup>st</sup> treatment; ANED (18)        | Somatic-type malignancy in liver metastasis (follicular carcinoma) 22 years after primary tumor resection | Shannon, 2017 [22] |
| 1             | 12y                  | Ovary: imTE, grade III        | Right                    | Pelvic implants: 3.5x1.5; chest implants: 2x1; diaphragm implants: 2.5 | FIGO IIC | Abdominal distension with mass, weight loss | Elevated AFP | Pelvic, 9x8; peritoneal implant next to liver: 7x7 | Right SO→4BEP→Resection→Experimental protocol (temozolomide + tretinoin + sorafenib) | None          | “Without new tumor growths”                               | Rupture of primary tumor and seeding                                                                      | Rentea, 2017 [23]  |
| 1             | 13y                  | Ovary: imTE (grade II);       | Right                    | N/A                                                                    | N/A      | Abdominal distension                        | Elevated AFP | Abdominal (peri-                                   | Right SO→Left SO +                                                                   | None          | Disease relapse (3 after right SO; 2                      | Patient was initially                                                                                     | Johnson,           |

|   |                               |                                                                                       |           |                 |                                                                                                    |                                               |                  |                                                                                 |                                                                                                       |      |                                                                                                                                                                                                                            |                                                                                                                                                 |                              |
|---|-------------------------------|---------------------------------------------------------------------------------------|-----------|-----------------|----------------------------------------------------------------------------------------------------|-----------------------------------------------|------------------|---------------------------------------------------------------------------------|-------------------------------------------------------------------------------------------------------|------|----------------------------------------------------------------------------------------------------------------------------------------------------------------------------------------------------------------------------|-------------------------------------------------------------------------------------------------------------------------------------------------|------------------------------|
|   |                               | pelvic mass:<br>imTE + mTE                                                            |           |                 |                                                                                                    |                                               | and<br>LDH       | hepatic/spl<br>enic)                                                            | TH→4BEP+2EP<br>→Resection                                                                             |      | weeks after CT);<br>ANED (30)                                                                                                                                                                                              | under-<br>staged (IA)                                                                                                                           | 2017<br>[24]                 |
| 1 | 14y                           | Ovaries:<br>mTE (left) +<br>imTE grade<br>III (right)                                 | Bilateral | 12-13           | IA                                                                                                 | Abdominal<br>distension<br>and pelvic<br>pain | Elevate<br>d AFP | Liver, 5x4;<br>left ovary:<br>6x4                                               | Right SO + Left<br>cystectomy→4E<br>P→ 2 Resections                                                   | None | GTS 6 and 15 after SO;<br>ANED (11)                                                                                                                                                                                        | -                                                                                                                                               | Yakut<br>, 2016<br>[25]      |
| 6 | Median 24<br>(range<br>17-38) | Ovaries:<br>only imTE<br>patients<br>included<br>(grade III,<br>n=5; grade I,<br>n=1) | N/A       | N/A             | IA<br>(n=1);<br>IIIA<br>(n=2);<br>IIIC<br>(n=1);<br>IV<br>(n=2,<br>liver<br>and<br>small<br>bowel) | Pelvic pain<br>and bloating                   | N/A              | Pelvic +<br>Abdominal<br>(all<br>patients);<br>mediastina<br>l (n=1); 16-<br>23 | Surgery→4BEP/<br>EP→1 to 4<br>additional<br>resections<br>(complete<br>resections in 5/6<br>patients) | None | GTS (median 20 after<br>surgery, range 8-42;<br>median 12 after CT,<br>range 2-48);<br>recurrence of GTS<br>(n=3, 12-132 after 1 <sup>st</sup><br>GTS episode); ANED<br>(n=5, median 90,<br>range 24-166) and<br>AWD (n=1) | Crude<br>incidence<br>of GTS =<br>40% (6/15<br>patients<br>with imTE<br>receiving<br>CT);<br>disease<br>stage<br>associated<br>with GTS<br>risk | Nguy<br>en,<br>2016<br>[26]  |
| 1 | PT:<br>16y;<br>GTS:<br>25y    | Ovary: imTE                                                                           | Right     | Ovary:<br>40x25 | N/A                                                                                                | Abdominal<br>distension<br>and pain           | N/A              | Abdominal<br>, 29x24                                                            | Right<br>O→4BEP→<br>Resection                                                                         | None | GTS 108 after O;<br>ANED (14)                                                                                                                                                                                              | Successful<br>pregnancy                                                                                                                         | Li S,<br>2016<br>[27]        |
| 1 | PT:<br>14y;<br>GTS:<br>24y    | Ovary:<br>imTE, grade<br>II                                                           | Right     | N/A             | N/A                                                                                                | Abdominal<br>pain                             | N/A              | Abdominal<br>(liver +<br>spleen),<br>19x16                                      | Right O→ 3BEP<br>→ Resection                                                                          | None | GTS 120 after O;<br>ANED (6)                                                                                                                                                                                               | -                                                                                                                                               | Li X,<br>2016<br>[28]        |
| 1 | 10y                           | Ovaries/pelv<br>ic: imTE<br>(biopsy)                                                  | N/A       | N/A             | N/A                                                                                                | Abdominal<br>distension<br>and pain           | Elevate<br>d AFP | Abdominal<br>, N/A                                                              | 4BEP→Resectio<br>n                                                                                    | None | ANED (6)                                                                                                                                                                                                                   | -                                                                                                                                               | Katari<br>a,<br>2016<br>[29] |
| 1 | 37y                           | Ovary:<br>imTE, grade<br>III; pelvic<br>recurrence:<br>imTE + mTE                     | Left      | N/A             | N/A                                                                                                | N/A                                           | Elevate<br>d AFP | Abdominal<br>/pelvic +<br>Liver, N/A                                            | Left SO→<br>Resection<br>→4BEP→<br>Resection                                                          | None | Disease relapse (4<br>after SO); GTS 9 after<br>SO; ANED (10)                                                                                                                                                              | -                                                                                                                                               | Soufi,<br>2015<br>[30]       |

|   |                            |                              |       |                                                                                                   |              |                                                                          |                  |                                                                                                               |                                                       |             |                                                                                                            |                                                                                                |                               |
|---|----------------------------|------------------------------|-------|---------------------------------------------------------------------------------------------------|--------------|--------------------------------------------------------------------------|------------------|---------------------------------------------------------------------------------------------------------------|-------------------------------------------------------|-------------|------------------------------------------------------------------------------------------------------------|------------------------------------------------------------------------------------------------|-------------------------------|
| 1 | PT:<br>20y;<br>GTS:<br>21y | Ovary:<br>imTE, grade<br>III | Left  | Ovary: 17;<br>peritoneal<br>implants:<br>0.5                                                      | FIGO<br>IIIB | Abdominal<br>distension                                                  | Elevate<br>d AFP | Abdominal<br>, 5                                                                                              | Left<br>SO→3BEP→<br>Resection<br>(laparoscopic)       | None        | GTS 17 after SO;<br>ANED (12)                                                                              | Residual<br>disease in<br>SO;<br>immature<br>glial<br>peritoneal<br>implants                   | Shiget<br>a,<br>2015<br>[31]  |
| 1 | 15y                        | Ovary:<br>imTE, grade<br>III | Left  | Ovary: 25;<br>implants:<br>8 and 5                                                                | N/A          | Abdominal<br>pain and<br>asthenia                                        | Elevate<br>d AFP | Retro-<br>hepatic<br>(12),<br>cardiophre<br>nic, pelvic<br>(8)                                                | Left<br>SO→BEP+5TIP<br>→ Resections                   | None        | ANED (N/A)                                                                                                 | <i>Gliomatosis<br/>peritonei</i>                                                               | Portill<br>a,<br>2015<br>[32] |
| 1 | 15y                        | Ovary: imTE                  | Left  | Ovarian/<br>Pelvic:<br>20x12;<br>Peritoneal<br>implants<br>(7x6) and<br>peri-<br>hepatic<br>(8x6) | FIGO<br>III  | Abdominal<br>distension<br>and pain                                      | Elevate<br>d AFP | Peritoneal<br>implants<br>(7x3) and<br>peri-<br>hepatic<br>(12x8)                                             | Left<br>SO→3BEP+5TIP<br>→ Resection                   | None        | Disease progression<br>(23 days after SO);<br>ANED (5)                                                     | <i>Gliomatosis<br/>peritonei</i>                                                               | Ocam<br>ica,<br>2015<br>[33]  |
| 2 | 27y                        | Ovary:<br>imTE, grade<br>III | Left  | Ovary:<br>19x15                                                                                   | IA           | Abdominal<br>and back pain                                               | Norma<br>l       | Pelvic,<br>N/A                                                                                                | Left<br>SO→3BEP+4EP<br>→ Resection →<br>Surveillance  | None        | Disease relapse (8<br>after first resection);<br>AWD (8)                                                   | <i>Gliomatosis<br/>peritonei</i> ;<br>viable<br>pregnancy<br>during<br>treatment<br>(after CT) | Merar<br>d,<br>2015<br>[34]   |
|   | 22y                        | Ovary:<br>imTE, grade<br>II  | Right | Ovary:<br>20x12                                                                                   | IIB          | Neurologic /<br>behavioral<br>symptoms<br>and<br>abdominal<br>distension | Elevate<br>d AFP | Liver (1 <sup>st</sup> ,<br>3.5); colon,<br>pouch of<br>Douglas<br>and left<br>ovary (2 <sup>nd</sup> ,<br>2) | Right<br>SO→4BEP→<br>Resection→2BE<br>P→ 2 Resections | Infertility | GTS 5 after SO; 2 after<br>liver resection; “few<br>months” after 2 <sup>nd</sup><br>resection; ANED (108) | <i>Paraneopla<br/>stic<br/>syndrome<br/>(anti-<br/>NMDA<br/>receptor<br/>encephaliti</i>       |                               |





|   |                       |                                   |       |              |                       |                                      |                              |                                                          |                                  |                                               |                                                                                                                                 |                                                | AFP – true case?  |  |
|---|-----------------------|-----------------------------------|-------|--------------|-----------------------|--------------------------------------|------------------------------|----------------------------------------------------------|----------------------------------|-----------------------------------------------|---------------------------------------------------------------------------------------------------------------------------------|------------------------------------------------|-------------------|--|
| 1 | PT: 29y; GTS: 30y     | Ovary: “immature germ cell tumor” | Right | Ovary: 6x5.5 | N/A                   | Abdominal pain and distension        | Elevated AFP and $\beta$ HCG | Liver and lung                                           | Right SO→3BEP                    | None                                          | GTS 12 after SO; ANED                                                                                                           | -                                              | Panda, 2014 [37]  |  |
| 1 | PT: 12y; GTS: 30      | Ovary: imTE                       | N/A   | N/A          | N+ (lymph nodes)      | Abdominal mass, respiratory distress | N/A                          | Abdominal/pelvic, 40                                     | TH+BSO→CT (incomplete)→Resection | Massive blood loss, respiratory complications | GTS 216 after surgery; ANED                                                                                                     | -                                              | Ohashi, 2014 [38] |  |
| 5 | PT: 20y (range 13-17) | Ovary: imTE (n=3) and YST (n=2)   | N/A   | N/A          | III (n=2) and I (n=2) | N/A                                  | Elevated AFP in all          | Abdominal/pelvic (n=3), ovarian (n=2); 2.2-6.4, 3.3, 5.5 | Surgery→BEP→Surgery              | None                                          | GTS 29 after surgery (range 5-83); ANED or insufficient FUp                                                                     | 4/5 were asymptomatic at time of GTS diagnosis | Han, 2014 [39]    |  |
| 1 | 4y                    | Ovary: mixed (YST, TE, Dysg)      | Left  | 17           | N/A                   | Abdominal swelling, vomiting         | Elevated AFP and $\beta$ HCG | Retroperitoneal (multiple implants)                      | Resection→CT→Multiple resections | None                                          | Disease relapse (4 after 1 <sup>st</sup> resection, 7 after 2 <sup>nd</sup> resection; 5 after 3 <sup>rd</sup> resection); ANED | -                                              | Daher, 2014 [40]  |  |

**Abbreviations:** AFP: alpha fetoprotein; ANED: alive with no evidence of disease; AWD: alive with disease;  $\beta$ -HCG: human chorionic gonadotropin subunit  $\beta$ ; CT: chemotherapy; DFD: died from disease; DWD: died with disease; Dysg: dysgerminoma; FUp: follow-up; GTS – growing teratoma syndrome; imTE: immature teratoma; LDH: lactate dehydrogenase; mTE: mature teratoma; N/A – not available; O: oophorectomy; PT: primary tumor; SO: salpingo-oophorectomy; TH: total hysterectomy; TM: tumor markers; YST: yolk sac tumor

**Table S4.** – Review of the literature regarding growing teratoma syndrome with extragonadal origin.

| Number of patients | Age      | Primary Tumor Location | Primary Tumor Histology | Pre-CT Tumor Size (cm) | Staging | Presentation                     | TM Before CT  | Topography and Size of GTS Masses | Treatments Performed   | Complications                                 | Patient Outcome / Follow-up after Last Treatment (months)                                      | Relevant Details                                                   | Author (Ref.)             |
|--------------------|----------|------------------------|-------------------------|------------------------|---------|----------------------------------|---------------|-----------------------------------|------------------------|-----------------------------------------------|------------------------------------------------------------------------------------------------|--------------------------------------------------------------------|---------------------------|
| 3 (♂)              | 24y      | Med                    | imTE                    | 13×13×16               | N/A     | Respiratory symptoms, chest pain | Elevated (S3) | Med, 12×15×19                     | 3BEP→Resection         | None                                          | ANED (28)                                                                                      | -                                                                  | Sachdeva et al, 2019 [41] |
|                    | 21y      |                        | mTE                     | 23×13×13               |         |                                  | Elevated      | Med, 25×18×15                     | 3BEP+2EP→Resection     | None                                          | ANED (24)                                                                                      |                                                                    |                           |
|                    | 22y      |                        | imTE                    | N/A                    |         |                                  | Elevated      | Med, 16×14×13                     | 3BEP→2 resections      | None                                          | Disease relapse (7); ANED (16 after 2 <sup>nd</sup> resection)                                 |                                                                    |                           |
| 1 (♂)              | 1m       | Sacr                   | mTE                     | N/A                    | N/A     | Detected in fetal US             | N/A           | Sacr, N/A                         | Resection→CT→Resection | Spinal cord compression                       | ANED (N/A)                                                                                     | -                                                                  | Sertbas et al, 2019 [42]  |
| 1 (♂)              | 26y      | Med                    | Mixed (SE, YST, TE)     | N/A                    | N/A     | Dyspnea, orthopnea and fever     | Elevated      | Med, 14×10                        | 3BEP→2 resections      | Massive bleeding (incomplete first resection) | Disease relapse (~12 after 1 <sup>st</sup> resection); DFD (3 after 2 <sup>nd</sup> resection) | Somatic-type malignancy in 2 <sup>nd</sup> resection: angiosarcoma | Matsuoka et al, 2019 [43] |
| 1 (♂)              | PT: 23y; | Cranial (pineal)       | N/A (biopsy non-)       | N/A                    | N/A     | Headache, nausea,                | Normal        | Cranial, 2×1.5                    | RT→Resection           | None                                          | Disease relapse (108 after                                                                     | No CT, but RT – true GTS?                                          | Khoo B et al, 2017 [44]   |

|       |                            |                     |                                  |                  |                           |                                                            |                                                                                              |                            |                                                                                                                |                                                                                                 |                                                                                                                                    |                                                                                                                                       |                               |  |
|-------|----------------------------|---------------------|----------------------------------|------------------|---------------------------|------------------------------------------------------------|----------------------------------------------------------------------------------------------|----------------------------|----------------------------------------------------------------------------------------------------------------|-------------------------------------------------------------------------------------------------|------------------------------------------------------------------------------------------------------------------------------------|---------------------------------------------------------------------------------------------------------------------------------------|-------------------------------|--|
|       | GTS:<br>32y                |                     | diagnostic<br>)                  |                  |                           | poor<br>balance                                            |                                                                                              |                            |                                                                                                                |                                                                                                 | RT);<br>ANED                                                                                                                       |                                                                                                                                       |                               |  |
| 1 (♂) | PT:<br>51y;<br>GTS:<br>69y | Med                 | mTE (first<br>two<br>resections) | 5, 8 and<br>10×9 | N/A                       | Mass                                                       | Normal in<br>first two<br>resections;<br>elevated<br>AFP and<br>βHCG<br>(third<br>resection) | Med, 15×13                 | Resections at 51, 59<br>and 69<br>years→3BEP→<br>Resection                                                     | Severe<br>respiratory<br>distress<br>needing<br>mechanical<br>ventilation                       | Disease<br>relapse<br>(96 after<br>1 <sup>st</sup><br>resection<br>and 120<br>after 2 <sup>nd</sup><br>resection);<br>ANED<br>(54) | -                                                                                                                                     | Hakiri et<br>al, 2017<br>[45] |  |
| 1 (♂) | 37y                        | RP                  | Mixed<br>(imTE,<br>YST)          | 16 + 8           | cT× N1<br>M1b S3<br>(IIC) | Abdomina<br>l<br>distension<br>and pain,<br>weight<br>loss | Elevated<br>AFP,<br>βHCG<br>and LDH<br>(S3)                                                  | Abdominal/p<br>elvic, 10×8 | Resection→4BEP<br>→ Resection                                                                                  | Severe<br>myelodyspl<br>asia<br>secondary to<br>therapy                                         | DFD (5)                                                                                                                            | Klinefelter<br>syndrome<br>patient                                                                                                    | Konheim<br>, 2017<br>[46]     |  |
| 1 (♂) | 5y                         | Cranial<br>(pineal) | mTE<br>(biopsy)                  | N/A              | N/A                       | Gaze<br>paresis<br>and<br>headache                         | Elevated<br>AFP                                                                              | Cranial, N/A               | “Cisplatin-based<br>CT” → Resections<br>(incomplete) →<br>interferonα-2b →<br>Palbociclib →<br>Thermoablations | Neurologic<br>symptoms,<br>central<br>venous<br>sinus<br>thrombosis,<br>respiratory<br>distress | AWD (30<br>after<br>diagnosis)                                                                                                     | Experimental<br>drug<br>Palbociclib<br>(CDK<br>inhibitor)                                                                             | Schultz,<br>2015 [47]         |  |
| 1 (♂) | 13y                        | Cranial<br>(pineal) | Germinom<br>a (biopsy)           | 3.3              | N/A                       | Headache,<br>gaze palsy<br>and<br>vomiting                 | Normal                                                                                       | Cranial, N/A               | Open<br>biopsy→3EP→RT<br>→ Resection →RT                                                                       | None                                                                                            | Disease<br>progressi<br>on under<br>CT (at 2 <sup>nd</sup><br>course);<br>ANED (9)                                                 | Biopsy not<br>representative<br>(mixed<br>tumor?);<br>report of<br>another case<br>of enlarging<br>mTE, but not<br>treated with<br>CT | Oya,<br>2014 [48]             |  |

|        |     |                  |     |     |     |                               |                              |         |                                                                                                                                                                         |                                | (expanding definition?)                                                               |                                                                                           |                  |
|--------|-----|------------------|-----|-----|-----|-------------------------------|------------------------------|---------|-------------------------------------------------------------------------------------------------------------------------------------------------------------------------|--------------------------------|---------------------------------------------------------------------------------------|-------------------------------------------------------------------------------------------|------------------|
| 2 (67) | 12y | Cranial (pineal) | N/A | N/A | N/A | Headache, double vision       | Elevated AFP (serum and CSF) | Cranial | Carboplatin/etoposide and ifosfamide/etoposide → partial resection → RT → M multiple resections along with chemotherapy → Final total resection and submyeloablative CT | None                           | Disease progression under CT after partial resection; ANED (36 after final treatment) | Successive partial resections; rhabdomyosarcoma in one of resections (somatic malignancy) | Glass, 2014 [49] |
|        | 7y  | Cranial (pineal) | N/A | N/A | N/A | Diplopia, Parinaud's syndrome | Elevated AFP and β-HCG       | Cranial | CT → partial resection → RT → R resection                                                                                                                               | Precocious puberty; hemorrhage | DFD (4.5 after surgery)                                                               | "somatic malignancy in the form of carcinoma" at the second resection                     |                  |

**Abbreviations:** AFP: alpha fetoprotein; ANED: alive with no evidence of disease; AWD: alive with disease; β-HCG: human chorionic gonadotropin subunit β; CSF: cerebral spinal fluid; CT: chemotherapy; DFD: died from disease; GTS – growing teratoma syndrome; imTE: immature teratoma; LDH: lactate dehydrogenase; Med: mediastinal; mTE: mature teratoma; N/A – not available; PT: primary tumor; RT: radiotherapy; RP: retroperitoneal; Sacr: sacral; SE – seminoma; TM: tumor markers; US: ultrasound; YST: yolk sac tumor

## References

1. Drayton, R.M.; Catto, J.W. Molecular mechanisms of cisplatin resistance in bladder cancer. *Expert Rev. Anticancer* **2012**, *12*, 271–281, doi:10.1586/era.11.201.
2. Damia, G.; Broggin, M. Platinum Resistance in Ovarian Cancer: Role of DNA Repair. *Cancers (Basel)* **2019**, *11*, doi:10.3390/cancers11010119.
3. Srivastava, A.K.; Han, C.; Zhao, R.; Cui, T.; Dai, Y.; Mao, C.; Zhao, W.; Zhang, X.; Yu, J.; Wang, Q.E. Enhanced expression of DNA polymerase eta contributes to cisplatin resistance of ovarian cancer stem cells. *Proc. Natl. Acad. Sci. USA* **2015**, *112*, 4411–4416, doi:10.1073/pnas.1421365112.
4. Li, H.; Wang, H.; Deng, K.; Han, W.; Hong, B.; Lin, W. The ratio of Bcl-2/Bim as a predictor of cisplatin response provides a rational combination of ABT-263 with cisplatin or radiation in small cell lung cancer. *Cancer Biomark.* **2019**, *24*, 51–59, doi:10.3233/CBM-181692.
5. Liu, X.; Huang, Z.; Qian, W.; Zhang, Q.; Sun, J. Silence of lncRNA UCA1 rescues drug resistance of cisplatin to non-small-cell lung cancer cells. *J. Cell Biochem.* **2019**, *120*, 9243–9249, doi:10.1002/jcb.28200.
6. Ceppi, P.; Novello, S.; Cambieri, A.; Longo, M.; Monica, V.; Lo Iacono, M.; Giaj-Levra, M.; Saviozzi, S.; Volante, M.; Papotti, M.; et al. Polymerase eta mRNA expression predicts survival of non-small cell lung cancer patients treated with platinum-based chemotherapy. *Clin. Cancer Res.* **2009**, *15*, 1039–1045, doi:10.1158/1078-0432.CCR-08-1227.
7. Lin, W.C.; Chen, L.H.; Hsieh, Y.C.; Yang, P.W.; Lai, L.C.; Chuang, E.Y.; Lee, J.M.; Tsai, M.H. miR-338-5p inhibits cell proliferation, colony formation, migration and cisplatin resistance in esophageal squamous cancer cells by targeting FERMT2. *Carcinogenesis* **2019**, *40*, 883–892, doi:10.1093/carcin/bgy189.
8. Liao, J.K.; Zhou, B.; Zhuang, X.M.; Zhuang, P.L.; Zhang, D.M.; Chen, W.L. Cancer-associated fibroblasts confer cisplatin resistance of tongue cancer via autophagy activation. *Biomed. Pharm.* **2018**, *97*, 1341–1348, doi:10.1016/j.biopha.2017.11.024.
9. Sun, J.; Xu, Z.; Lv, H.; Wang, Y.; Wang, L.; Ni, Y.; Wang, X.; Hu, C.; Chen, S.; Teng, F., et al. eIF5A2 regulates the resistance of gastric cancer cells to cisplatin via induction of EMT. *Am. J. Transl. Res.* **2018**, *10*, 4269–4279.
10. Sui, G.; Qiu, Y.; Yu, H.; Kong, Q.; Zhen, B. Interleukin-17 promotes the development of cisplatin resistance in colorectal cancer. *Oncol. Lett.* **2019**, *17*, 944–950, doi:10.3892/ol.2018.9645.
11. Mendoza-Rodriguez, M.G.; Ayala-Summano, J.T.; Garcia-Morales, L.; Zamudio-Meza, H.; Perez-Yepe, E.A.; Meza, I. IL-1beta Inflammatory Cytokine-Induced TP63 Isoform NP63alpha Signaling Cascade Contributes to Cisplatin Resistance in Human Breast Cancer Cells. *Int. J. Mol. Sci.* **2019**, *20*, doi:10.3390/ijms20020270.
12. Zhu, H.; Luo, H.; Zhang, W.; Shen, Z.; Hu, X.; Zhu, X. Molecular mechanisms of cisplatin resistance in cervical cancer. *Drug Des. Devel.* **2016**, *10*, 1885–1895, doi:10.2147/DDDT.S106412.
13. Nassiri, N.; Shah, A.; Daneshmand, S. Growing Teratoma Syndrome of Testicular Origin. *Urology* **2019**, *123*, 20–23, doi:10.1016/j.urology.2018.05.015.
14. Tanaka, K.; Toyokawa, G.; Tagawa, T.; Ijichi, K.; Haratake, N.; Hirai, F.; Oda, Y.; Maehara, Y. Successful Treatment of Growing Teratoma Syndrome of the Lung by Surgical Resection: A Case Report and Literature Review. *Anticancer Res.* **2018**, *38*, 3115–3118, doi:10.21873/anticancer.12571.
15. Paffenholz, P.; Pfister, D.; Matveev, V.; Heidenreich, A. Diagnosis and management of the growing teratoma syndrome: A single-center experience and review of the literature. *Urol. Oncol.* **2018**, *36*, 529 e523–529, doi:10.1016/j.urolonc.2018.09.012.
16. Priod, F.; Lorge, F.; Di Gregorio, M.; Dupont, M.V.; Nollevaux, M.C.; Faugeras, L.; Lawson, G.; Eucher, P.; D'Hondt, L. Recurrent Masses after Testicular Cancer: Growing Teratoma Syndrome. A Case Report and Review of the Literature. *Case Rep. Oncol.* **2017**, *10*, 910–915, doi:10.1159/000481397.
17. Gange, W.S.; Blackwell, R.H.; Biemer, J.; Barkan, G.A.; Picken, M.M.; Quek, M.L. Oligometastatic Growing Teratoma Syndrome: A Case for an Aggressive Surgical Approach. *Curr. Urol.* **2016**, *9*, 163–165, doi:10.1159/000447134.
18. Scavuzzo, A.; Santana Rios, Z.A.; Noveron, N.R.; Jimenez Rios, M.A. Growing teratoma syndrome. *Case Rep. Urol.* **2014**, *2014*, 139425, doi:10.1155/2014/139425.
19. Roubelakis, A.; Modi, A.; Ohri, S.K. Isolated tricuspid valve repair after metastatic tumor resection. *Ann. Thorac. Surg.* **2014**, *98*, 1447–1449, doi:10.1016/j.athoracsur.2013.12.057.

20. Lee, D.J.; Djaladat, H.; Tadros, N.N.; Movassaghi, M.; Tejura, T.; Duddalwar, V.; Daneshmand, S. Growing teratoma syndrome: clinical and radiographic characteristics. *Int. J. Urol.* **2014**, *21*, 905–908, doi:10.1111/iju.12466.
21. Saba, A.; Khan, R.S.; Ismail, H. Growing teratoma syndrome in ovarian germ cell tumours - a diagnostic challenge, two case reports. *J. Pak. Med. Assoc.* **2018**, *68*, 945–946.
22. Shannon, N.B.; Chan, N.H.L.; Teo, M.C.C. Recurrence of immature ovarian teratoma as malignant follicular carcinoma with liver and peritoneal metastasis 22 years after completion of initial treatment. *BMJ Case Rep.* **2017**, *2017*, doi:10.1136/bcr-2017-219665.
23. Rentea, R.M.; Varghese, A.; Ahmed, A.; Kats, A.; Manalang, M.; Dowlut-McElroy, T.; Hendrickson, R.J. Pediatric Ovarian Growing Teratoma Syndrome. *Case Rep. Surg.* **2017**, *2017*, 3074240, doi:10.1155/2017/3074240.
24. Johnson, L.R.; Sambasivan, S.; Nair, R.P.; Mony, R.P.; Sebastian, J.E.; Ahamed, I.M. Growing Teratoma Syndrome Following Treatment for Immature Teratoma of Ovary-A Case Report and Review of Literature. *J. Obs. Gynaecol. India.* **2017**, *67*, 295–298, doi:10.1007/s13224-016-0948-1.
25. Yakut, H.I.; Korkmaz, E.; Cetinkaya, N.; Baser, E.; Irkkan, C.; Gungor, T. Recurrent 'growing teratoma syndrome' in an adolescent girl with a history of ovarian immature teratoma: A case report. *J. Obs. Gynaecol.* **2016**, *36*, 845–847, doi:10.3109/01443615.2016.1168371.
26. Van Nguyen, J.M.; Bouchard-Fortier, G.; Ferguson, S.E.; Covens, A. How Common Is the Growing Teratoma Syndrome in Patients With Ovarian Immature Teratoma? *Int. J. Gynecol. Cancer* **2016**, *26*, 1201–1206, doi:10.1097/IGC.0000000000000751.
27. Li, S.; Liu, Z.; Dong, C.; Long, F.; Liu, Q.; Sun, D.; Gao, Z.; Wang, L. Growing Teratoma Syndrome Secondary to Ovarian Giant Immature Teratoma in an Adolescent Girl: A Case Report and Literature Review. *Med. (Baltim. )* **2016**, *95*, e2647, doi:10.1097/MD.0000000000002647.
28. Li, X.; Zhu, D.; Lv, L.I.; Yu, J. An uncommon recurrence of an immature teratoma: A case report. *Oncol. Lett.* **2016**, *11*, 2453–2456, doi:10.3892/ol.2016.4254.
29. Kataria, S.P.; Varshney, A.N.; Nagar, M.; Mandal, A.K.; Jha, V. Growing Teratoma Syndrome. *Indian J. Surg. Oncol.* **2017**, *8*, 46–50, doi:10.1007/s13193-016-0568-3.
30. 10Soufi, M.; Lupinacci, R.M.; Godiris-Petit, G.; Vignot, S.; Genestie, C.; Menegaux, F.; Lefranc, J.P. Growing teratoma syndrome of the ovary presenting with liver metastasis: report of a case. *Eur. J. Gynaecol. Oncol.* **2015**, *36*, 473–476.
31. Shigeta, N.; Kobayashi, E.; Sawada, K.; Ueda, Y.; Yoshino, K.; Hori, Y.; Kimura, T. Laparoscopic excisional surgery for growing teratoma syndrome of the ovary: case report and literature review. *J. Minim. Invasive Gynecol.* **2015**, *22*, 668–674, doi:10.1016/j.jmig.2015.01.011.
32. Gomez-Portilla, A.; Bustamante, R.; Lopez de Heredia, E.; Lete, L.I.; Cuadra, M.; Dominguez, S. Growing teratoma syndrome: an unusual evolution of treated ovarian immature teratoma - a case report. *Eur. J. Gynaecol. Oncol.* **2016**, *37*, 729–731.
33. Lapuente-Ocamica, O.; Ugarte, L.; Cuadra, M.; Lopez-Picado, A.; Maestro, L.; Lete, I. Growing teratoma syndrome after ovarian immature teratoma: a case report and review of the literature. *Clin. Exp. Obs. Gynecol.* **2016**, *43*, 905–910.
34. Merard, R.; Ganesan, R.; Hirschowitz, L. Growing Teratoma Syndrome: A Report of 2 Cases and Review of the Literature. *Int. J. Gynecol. Pathol.* **2015**, *34*, 465–472, doi:10.1097/PGP.000000000000180.
35. Bentivegna, E.; Azais, H.; Uzan, C.; Leary, A.; Pautier, P.; Gonthier, C.; Genestie, C.; Balleyguier, C.; Lhomme, C.; Duvillard, P.; et al. Surgical Outcomes After Debulking Surgery for Intraabdominal Ovarian Growing Teratoma Syndrome: Analysis of 38 Cases. *Ann. Surg. Oncol.* **2015**, *22* (3), S964–970, doi:10.1245/s10434-015-4608-y.
36. Pendlebury, A.; Rischin, D.; Ireland-Jenkin, K.; Toner, G.C.; Grant, P. Ovarian Growing Teratoma Syndrome With Spuriously Elevated alpha-Fetoprotein. *J. Clin. Oncol.* **2015**, *33*, e99–100, doi:10.1200/JCO.2013.49.8998.
37. Panda, A.; Kandasamy, D.; Sh, C.; Jana, M. Growing teratoma syndrome of ovary: avoiding a misdiagnosis of tumour recurrence. *J. Clin. Diagn. Res.* **2014**, *8*, 197–198, doi:10.7860/JCDR/2014/7407.3837.
38. Ohashi, N.; Imai, H.; Tobita, T.; Ishii, H.; Baba, H. Anesthetic management in a patient with giant growing teratoma syndrome: a case report. *J. Med. Case Rep.* **2014**, *8*, 32, doi:10.1186/1752-1947-8-32.

39. Han, N.Y.; Sung, D.J.; Park, B.J.; Kim, M.J.; Cho, S.B.; Kim, K.A.; Song, J.Y. Imaging features of growing teratoma syndrome following a malignant ovarian germ cell tumor. *J. Comput Assist. Tomogr.* **2014**, *38*, 551–557, doi:10.1097/RCT.0000000000000073.
40. Daher, P.; Riachy, E.; Khoury, A.; Raffoul, L.; Ghorra, C.; Rehayem, C. Growing teratoma syndrome: first case report in a 4-year-old girl. *J. Pediatr. Adolesc. Gynecol.* **2015**, *28*, e5–e7, doi:10.1016/j.jpag.2014.03.003.
41. Sachdeva, A.K.; Penumadu, P.; Kohli, P.; Dubashi, B.; Munuswamy, H. Growing teratoma syndrome in primary mediastinal germ cell tumor: our experience. *Asian Cardiovasc. Thorac. Ann.* **2019**, *27*, 98–104, doi:10.1177/0218492318823345.
42. Sertbas, I.; Karatay, M. Enlarging teratoma syndrome. *Childs Nerv. Syst.* **2019**, *35*, 369–372, doi:10.1007/s00381-018-3956-x.
43. Matsuoka, S.; Koyama, T.; Takeda, T.; Yamada, K.; Hyogotani, A.; Hamanaka, K.; Sekiguchi, N.; Koizumi, T. Development of angiosarcoma in a mediastinal non-seminomatous germ cell tumor that exhibited growing teratoma syndrome during chemotherapy. *Thorac. Cancer* **2019**, *10*, 111–115, doi:10.1111/1759-7714.12901.
44. Khoo, B.; Ramakonar, H.H.; Robbins, P.; Honeybul, S. Intracranial monodermal teratoma presenting with growing teratoma syndrome. *J. Surg. Case Rep.* **2017**, 2017, rjx038, doi:10.1093/jscr/rjx038.
45. Hakiri, S.; Kawaguchi, K.; Fukui, T.; Fukumoto, K.; Nakamura, S.; Yokoi, K. Metachronous Germ Cell Tumors of the Mediastinum. *Ann. Thorac. Surg.* **2017**, *103*, e525–e527, doi:10.1016/j.athoracsur.2016.11.067.
46. Konheim, J.A.; Israel, J.A.; Delacroix, S.E. Klinefelter Syndrome with Poor Risk Extragenadal Germ Cell Tumor. *Urol. Case Rep.* **2017**, *10*, 1–3, doi:10.1016/j.eucr.2016.09.006.
47. Schultz, K.A.; Petronio, J.; Bendel, A.; Patterson, R.; Vaughn, D.J. PD0332991 (palbociclib) for treatment of pediatric intracranial growing teratoma syndrome. *Pediatr. Blood Cancer* **2015**, *62*, 1072–1074, doi:10.1002/pbc.25338.
48. Oya, S.; Saito, A.; Okano, A.; Arai, E.; Yanai, K.; Matsui, T. The pathogenesis of intracranial growing teratoma syndrome: proliferation of tumor cells or formation of multiple expanding cysts? Two case reports and review of the literature. *Childs Nerv. Syst.* **2014**, *30*, 1455–1461, doi:10.1007/s00381-014-2396-5.
49. Glass, T.; Cochrane, D.D.; Rassekh, S.R.; Goddard, K.; Hukin, J. Growing teratoma syndrome in intracranial non-germinomatous germ cell tumors (iNGGCTs): a risk for secondary malignant transformation—a report of two cases. *Childs Nerv. Syst.* **2014**, *30*, 953–957, doi:10.1007/s00381-013-2295-1.
